# Supplementary material
Source: ML conference proceedings conference paper supplement (https://proceedings.mlr.press/v33/noy14.html)
Supplement: Supplementary file 1 [file noy14-supp.pdf]

## A Proof of Lemma 2

**Proof:** Since the support of LL distributions is  $\mathbb{R}^d$ , two such distributions are equivalent (absolutely continuous with respect to each other) and the divergence is well-defined.

We start by calculating the following integral, assuming  $\mu_1 \leq \mu_2$ :

$$\begin{aligned} I &= \int_{\mathbb{R}} \frac{|\omega - \mu_2|}{\sigma_2} \cdot \exp\left\{\frac{|\omega - \mu_1|}{\sigma_1}\right\} d\omega \\ &= \frac{\sigma_1}{\sigma_2} \left[ \int_{-\infty}^{\mu_1} -\frac{\omega - \mu_2}{\sigma_1} \cdot \exp\left\{-\frac{\omega - \mu_1}{\sigma_1}\right\} d\omega \right. \\ &\quad + \int_{\mu_1}^{\mu_2} -\frac{\omega - \mu_2}{\sigma_1} \cdot \exp\left\{\frac{\omega - \mu_1}{\sigma_1}\right\} d\omega \\ &\quad \left. + \int_{\mu_2}^{\infty} \frac{\omega - \mu_2}{\sigma_1} \cdot \exp\left\{\frac{\omega - \mu_1}{\sigma_1}\right\} d\omega \right]. \end{aligned}$$

Changing variables  $y = \frac{\omega - \mu_1}{\sigma_1}$  yields,

$$\begin{aligned} I &= \frac{\sigma_1^2}{\sigma_2} \left[ \int_{-\infty}^0 \left(-y + \frac{\mu_2 - \mu_1}{\sigma_1}\right) \cdot \exp\{y\} dy \right. \\ &\quad - \int_0^{\frac{\mu_2 - \mu_1}{\sigma_1}} \left(-y + \frac{\mu_2 - \mu_1}{\sigma_1}\right) \cdot \exp\{-y\} dy \\ &\quad \left. - \int_{\frac{\mu_2 - \mu_1}{\sigma_1}}^{\infty} \left(-y + \frac{\mu_2 - \mu_1}{\sigma_1}\right) \cdot \exp\{-y\} dy \right] \\ &= \frac{2\sigma_1^2}{\sigma_2} + \left[ \frac{\mu_2 - \mu_1}{\sigma_1} + \exp\left\{-\frac{\mu_2 - \mu_1}{\sigma_1}\right\} \right]. \end{aligned}$$

We thus conclude for the general case,

$$I = \frac{2\sigma_1^2}{\sigma_2} \left[ \frac{|\mu_2 - \mu_1|}{\sigma_1} + \exp\left\{-\frac{|\mu_2 - \mu_1|}{\sigma_1}\right\} \right]. \quad (15)$$

As for the Kulback-Leibler Divergence, we use the chain formula for independent random variables,

$$\begin{aligned} KL(Q\|P) &= \sum_{k=1}^d D_{\text{KL}}(Q_k\|P_k) = \sum_{k=1}^d \int_{\mathbb{R}} \log\left(\frac{Q_i}{P_i}\right) dQ_i \\ &= \sum_{k=1}^d \left[ \log\left(\frac{\sigma_{P,k}}{\sigma_{Q,k}}\right) + \int_{\mathbb{R}} (2\sigma_{Q,k})^{-1} \times \right. \\ &\quad \left. e^{-\frac{|\omega_k - \mu_{Q,k}|}{\sigma_{Q,k}}} \left[ \frac{|\omega_k - \mu_{P,k}|}{\sigma_{P,k}} - \frac{|\omega_k - \mu_{Q,k}|}{\sigma_{Q,k}} \right] d\omega_k \right]. \end{aligned}$$

The first term of the integral is given in (15), and the second term is exactly the 1-dimensional  $\sigma$ -weighted  $\ell_1$ -norm, therefore,  $(2\sigma_{Q,k})^{-1} \mathbb{E}_Q \left[ \frac{|\omega_k - \mu_{Q,k}|}{\sigma_{Q,k}} \right] = 1$ , which completes the proof.  $\blacksquare$

## B Proof of Lemma 3

**Proof:** We prove that,

$$\begin{aligned} \Pr_{\omega \sim Q} (y(\omega \cdot \mathbf{x}) < 0) &= \Pr_{\omega \sim Q} [y(\omega - \boldsymbol{\mu}) \cdot \mathbf{x} < -y(\boldsymbol{\mu} \cdot \mathbf{x})] \\ &= \mathcal{E}(\mathbf{x}, y, \boldsymbol{\mu}_Q, \sigma_Q). \end{aligned}$$

The random variable<sup>4</sup>

$$Z = y(\omega - \boldsymbol{\mu}) \cdot \mathbf{x},$$

is a sum of  $d$  independent zero-mean laplace distributed random variables,

$$Z_k \sim \text{Laplace}(0, \sigma_Q |x_k|),$$

each is equal in distribution to a difference between two i.i.d. exponential random variables. Therefore,

$$\Pr_{\omega \sim Q} (y(\omega \cdot \mathbf{x}) < 0) = \Pr \left( \sum_{k=1}^d A_k - \sum_{k=1}^d B_k < -y(\boldsymbol{\mu} \cdot \mathbf{x}) \right), \quad (16)$$

where  $A_k, B_k \sim \text{Exp}(\lambda_k)$  and,  $\lambda_k = \lambda_k(\mathbf{x}) = (\sigma_Q |x_k|)^{-1}$   $k = 1, \dots, d$ .

Without the loss of generality we assume that the coordinates of  $\mathbf{x}$  are sorted, i.e  $\lambda_1 < \lambda_2 \dots < \lambda_d$ . Calculating the convolution for  $x_j \neq x_k$  and  $z \geq 0$ ,

$$\begin{aligned} f_{A_j + A_k}(z) &= \int_0^z \lambda_j \lambda_k e^{-\lambda_j(-t)z} e^{-\lambda_k(t)z} dt \\ &= \frac{\lambda_j \lambda_k}{\lambda_j - \lambda_k} [e^{-\lambda_k z} - e^{-\lambda_j z}]. \end{aligned}$$

Exploiting the structure of the resulting convolution, we convolve it with the  $l$ th density and get,

$$\begin{aligned} f_{A_j + A_k + A_l}(z) &= \lambda_j \lambda_k \lambda_l \times \\ &\quad \frac{[(\lambda_m - \lambda_j) e^{-\lambda_k z} - (\lambda_m - \lambda_k) e^{-\lambda_j z} + (\lambda_j - \lambda_k) e^{-\lambda_m z}]}{(\lambda_j - \lambda_k) (\lambda_m - \lambda_j) (\lambda_m - \lambda_k)}. \end{aligned}$$

Performing convolution for all  $d$  densities yields,

$$f_{\sum_{k=1}^d A_k}(z) = \sum_{k=1}^d \xi_k e^{-\lambda_k z} \text{ for } z \geq 0,$$

$$\text{where we define } \xi_k = \xi_k(\mathbf{x}) = \frac{(-1)^{k-1} \prod_{j=1}^d \lambda_j}{\prod_{n=1, n \neq k}^d |\lambda_n - \lambda_k|}.$$

Similarly, we get the same result for  $f_{-\sum_{k=1}^d B_k}(z)$ , yet it is defined for  $z \leq 0$ . From (16) we convolute the

<sup>4</sup>Notice that if  $x_k = 0$  the random variable  $\omega_k x_k$  equals zero too, therefore we assume without loss of generality that  $x_k \neq 0$ .

difference and get,

$$\begin{aligned}
 f_{\sum_{k=1}^d A_k - B_k}(z) &= \left( f_{\sum_{k=1}^d A_k} * f_{-\sum_{k=1}^d B_k} \right)(z) \\
 &= \int_{-\infty}^{\min(z,0)} \left( \sum_{m=1}^d \xi_m e^{\lambda_m t} \right) \left( \sum_{k=1}^d \xi_k e^{\lambda_k(z-t)} \right) dt \\
 &= \sum_{m,n=1}^d \xi_m \xi_n e^{-\lambda_n z} \frac{e^{(\lambda_m + \lambda_n)t}}{\lambda_m + \lambda_n} \Big|_{-\infty}^{\min(z,0)} \\
 &= \sum_{m,n=1}^d \frac{\xi_m \xi_n}{\lambda_m + \lambda_n} e^{-\lambda_n |z|} = \sum_{k=1}^d \psi_k e^{-\lambda_k |z|} \\
 \text{for } \psi_k &= \psi_k(\mathbf{x}) = \sum_{m=1}^d \frac{\xi_m \xi_k}{\lambda_m + \lambda_k}.
 \end{aligned}$$

We integrate to get the CDF,

$$\begin{aligned}
 \ell_{cdf}(y(\boldsymbol{\omega} \cdot \mathbf{x})) &= \int_{z=-\infty}^{-y(\boldsymbol{\mu} \cdot \mathbf{x})} \sum_{k=1}^d \psi_k e^{-\lambda_k |z|} dz \\
 &= \begin{cases} \sum_{k=1}^d \frac{\psi_k}{\lambda_k} e^{-\lambda_k y(\boldsymbol{\mu} \cdot \mathbf{x})} & y(\boldsymbol{\mu} \cdot \mathbf{x}) \geq 0 \\ 1 - \sum_{k=1}^d \frac{\psi_k}{\lambda_k} e^{\lambda_k y(\boldsymbol{\mu} \cdot \mathbf{x})} & y(\boldsymbol{\mu} \cdot \mathbf{x}) < 0 \end{cases}
 \end{aligned}$$

Finally, we define  $\alpha_k(\mathbf{x}) = \frac{\psi_k(\mathbf{x})}{\lambda_k(\mathbf{x})}$  and obtain for  $\xi = \text{sort}(|x|)$  (3),

$$\begin{aligned}
 \alpha_k(\mathbf{x}) &= \xi_k \left( \prod_{j=1}^d \xi_j \right)^{-2} \prod_{j=1, j \neq k}^d |\xi_j^{-1} - \xi_k^{-1}|^{-1} \\
 &\times \sum_{m=1}^d (-1)^{m+k} (\xi_k^{-1} + \xi_m^{-1})^{-1} \prod_{j=1, j \neq m}^d |\xi_j^{-1} - \xi_m^{-1}|^{-1}.
 \end{aligned}$$

In particular, from the symmetry of  $f_{\sum_{k=1}^d A_k - B_k}(z)$ , we have for  $\boldsymbol{\mu} = 0$ , that

$$\frac{1}{2} = \Pr_{\boldsymbol{\omega} \sim \mathcal{Q}}(y(\boldsymbol{\omega} \cdot \mathbf{x}) < 0) = \sum_{k=1}^d \alpha_k,$$

which concludes the proof.  $\blacksquare$

## C Proof of Theorem 4

**Proof:** From the assumption that the data is linearly separable we conclude that the set  $\{\boldsymbol{\mu}_Q | y_i \mathbf{x}_i \cdot \boldsymbol{\mu}_Q \geq 0, i = 1, \dots, m\}$  is not empty. Additionally, the set is defined via linear constraints and thus convex. The objective (7) is convex in  $\sigma$  as its second derivative with respect to  $\sigma$  is  $d\sigma^{-2} > 0$ .

The regularization term of (7) is convex in  $\boldsymbol{\mu}$  as the second derivative of  $|z| + \exp(-|z|)$  is always positive and well defined for all values of  $z$  (see also Remark 1 for a discussion of this function for values  $z \approx 0$ ).

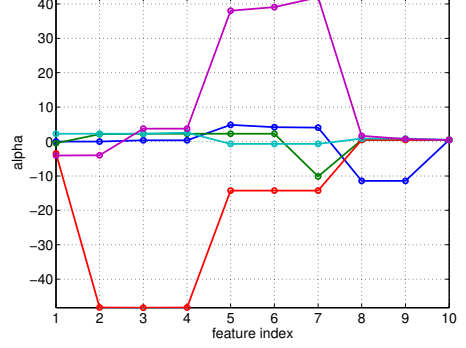

Figure 6: Illustration of the cumulative sums,  $\sum_{i=1}^k \alpha_i(\mathbf{x})$ , for five 10-dimensional vectors.

As for the loss term  $\ell(y_i \mathbf{x}_i \cdot \boldsymbol{\mu})$ , we use the following auxiliary lemma.

**Lemma 10** *The following set of probability density functions over the reals*

$$\begin{aligned}
 \mathbb{S} &= \left\{ f_{pdf} \mid f \in \mathcal{C}_1, f(z) = f(-z), \right. \\
 &\left. \text{and } \forall z_1, z_2, |z_2| > |z_1| \Rightarrow f(z_2) < f(z_1) \right\}
 \end{aligned}$$

is closed under convolution, i.e.  $f, g \in \mathbb{S} \rightarrow f * g \in \mathbb{S}$ .

Since the random variables  $\omega_1, \dots, \omega_d$  are independent, the density  $f_{Z_i}(z)$  of the margin  $Z_i = y_i(\boldsymbol{\omega} - \boldsymbol{\mu}_Q) \cdot \mathbf{x}_i$ , is obtained by convoluting  $d$  independent zero-mean Laplace distributed random variables  $y_i(\omega_k - \mu_{i,k})x_{i,k}$ . Since the 1-dimensional Laplace pdf is in  $\mathbb{S}$ , it follows from Lemma 10 by induction that so is  $f_{Z_i}$ . As a member of  $\mathbb{S}$ , the positivity of the derivative  $f'_{Z_i}(z)$  for  $z \leq 0$  is concluded from Lemma 10. Finally, we note that the integral of the density is  $\ell_{cdf}$ , the cumulative density function,  $\mathcal{E}(\mathbf{x}_i, y_i, \boldsymbol{\mu}_Q, \sigma_Q) = \int_{-\infty}^{-y_i \boldsymbol{\mu}_Q \cdot \mathbf{x}_i} f_{Z_i}(z) dz$ . Thus, the second derivative of  $\mathcal{E}(\mathbf{x}_i, y_i, \boldsymbol{\mu}_Q, \sigma_Q)$  for positive values of the margin, equals to  $f'_{Z_i}(z)$  for  $z \leq 0$ , and hence positive. Changing variables according to (6) completes the proof.  $\blacksquare$

## D Proof of Lemma 10

**Proof:** Assume  $f, g \in \mathbb{S}$  and denote by  $h = f * g$ . The derivative of a convolution between two differentiable functions always exists, and equals to,  $\frac{d}{dz}(f * g) =$

$f * \left(\frac{dg}{dz}\right)$ . We compute for the convolution derivative,

$$\begin{aligned} h'(z) &= \int_{-\infty}^{\infty} f(z-t) \cdot \left(\frac{dg(t)}{dt}\right) dt \\ &= \int_{-\infty}^0 f(z-t) \cdot \left(\frac{dg(t)}{dt}\right) dt + \int_0^{\infty} f(z-t) \cdot \left(\frac{dg(t)}{dt}\right) dt \\ &= \int_{-\infty}^0 f(z-t) \cdot \left(\frac{dg(t)}{dt}\right) dt + \int_{-\infty}^0 f(z+t) \cdot \left(\frac{dg(-t)}{dt}\right) dt \\ &= \int_{-\infty}^0 \left[ f(z-t) - f(z+t) \right] \left(\frac{dg(t)}{dt}\right) dt, \end{aligned}$$

where the last equality follows the fact  $\frac{dg(t)}{dt}$  is an odd function as a derivative of an even function. Since  $f, g \in \mathbb{S}, h(z) \in \mathcal{C}_1$  (i.e continuously differentiable almost everywhere), and since  $h'(z)$  is odd, we have that  $h(z)$  is even. Using the monotonicity property of  $f, g$ , i.e  $|z_2| > |z_1| \Rightarrow f(z_2) < f(z_1)$ , we get,

$$\begin{aligned} &\int_{-\infty}^0 \left[ f(z-t) - f(z+t) \right] \cdot \left(\frac{dg(t)}{dt}\right) dt \\ &= -\text{sign}(z) \cdot \int_{-\infty}^0 \left| f(z-t) - f(z+t) \right| \left| \frac{dg(t)}{dt} \right| dt. \end{aligned}$$

Since  $f, g$  are pdfs, the integral is always defined, and thus the sign of the derivative of  $h$  depends on the sign of its argument, and in particular it is an increasing function for  $z < 0$  and decreasing for  $z > 0$ , yielding the third property for  $h$ . Thus,  $h \in \mathbb{S}$ , as desired.  $\blacksquare$

## E Proof of Lemma 5

**Proof:** Setting  $\boldsymbol{\mu} = \mathbf{0}$  and  $\sigma = 1$  the objective becomes  $0 + cm\eta$ . Since the loss is non-negative we get that the minimizers satisfy,

$$\begin{aligned} cm\eta &\geq \\ &-d \log \sigma^* e + \sigma^* \sum_{k=1}^d \left[ |\mu_k^*| + e^{-|\mu_k^*|} \right] \\ &+ c \sum_i \ell(y_i \mathbf{x}_i \cdot \boldsymbol{\mu}^*) \geq \\ &-d \log \sigma^* e + \sigma^* \sum_{k=1}^d \left[ |\mu_k^*| + e^{-|\mu_k^*|} \right]. \end{aligned}$$

Substituting the optimal value of  $\sigma^*$  from (8) we get,

$$\begin{aligned} cm\eta &\geq -d \log \frac{ed}{\sum_{k=1}^d |\mu_k^*| + e^{-|\mu_k^*|}} + d \\ &= d \log \frac{\sum_{k=1}^d |\mu_k^*| + e^{-|\mu_k^*|}}{d}. \end{aligned}$$

Rearranging, we get,

$$d \exp\left(\frac{cm\eta}{d}\right) \geq \sum_{k=1}^d |\mu_k^*| + e^{-|\mu_k^*|} \geq \|\boldsymbol{\mu}^*\|_1,$$

and we can conclude,

$$\sigma^* \geq \exp\left(-\frac{cm\eta}{d}\right).$$

$\blacksquare$

## F Proof of Theorem 6

**Proof:** While the empirical loss term depends only on  $\boldsymbol{\mu}$ , and was proved to be strictly convex for examples that satisfies  $y_i \mathbf{x}_i \cdot \boldsymbol{\mu} \geq 0$  in theorem 4, the regularization term is optimized over both  $\boldsymbol{\mu}, \sigma$ . Incorporating the optimal value for sigma from (8) into the objective yields the following:

$$\begin{aligned} \mathcal{F}(\boldsymbol{\mu}, \sigma^*(\boldsymbol{\mu})) &= d \log \left( \sum_{k=1}^d |\mu_k| + e^{-|\mu_k|} \right) \\ &+ c \sum_{i=1}^m \ell(y_i \mathbf{x}_i \cdot \boldsymbol{\mu}). \end{aligned}$$

Differentiating the regularization term twice with respect to  $\boldsymbol{\mu}$  results in the following Hessian matrix,

$$\begin{aligned} H(\boldsymbol{\mu}) &= \frac{d}{\sum_{k=1}^d |\mu_k| + e^{-|\mu_k|}} \times \\ &\left[ \text{diag}(\exp[-\boldsymbol{\mu}]) - \frac{\mathbf{v} \cdot \mathbf{v}^\top}{\sum_{k=1}^d |\mu_k| + e^{-|\mu_k|}} \right], \end{aligned}$$

for the  $d$ -dimensional vector  $\mathbf{v}_k = \text{sign}(\mu_k) (1 - \exp[-|\mu_k|])$ , and  $\text{diag}(\exp[-\boldsymbol{\mu}])$  is a diagonal vector for which its  $i$ th elements equals  $\exp(-\mu_i)$ . The Hessian  $H(\boldsymbol{\mu})$  is a difference of two positive semi-definite matrices. We upper bound the maximal eigenvalues of the second term by its trace, indeed,

$$\begin{aligned} \max_j \lambda_j &\left( \frac{d}{\left(\sum_{k=1}^d |\mu_k| + e^{-|\mu_k|}\right)^2} \right) \\ &\leq \frac{d \mathbf{v}^\top \mathbf{v}}{\left(\sum_{k=1}^d |\mu_k| + e^{-|\mu_k|}\right)^2} \\ &= \frac{d \sum_{k=1}^d (1 - e^{-|\mu_k|})^2}{\left(\sum_{k=1}^d |\mu_k| + e^{-|\mu_k|}\right)^2} \\ &< \frac{d \times d}{d^2} = 1. \end{aligned}$$

Thus, the minimal eigenvalue of  $H(\boldsymbol{\mu})$  is bounded from below by  $(-1)$ , and the Hessian of the sum of the objective and  $\frac{1}{2}\|\boldsymbol{\mu}\|^2$  has positive eigenvalues, therefore strictly convex.

For the second part, we use [17, Corollary 7.2.3] stating that a diagonally-dominated matrix with non-negative diagonal values is PSD. We next show that indeed  $\|\boldsymbol{\mu}\|_\infty \leq 1$  is a sufficient condition for the Hessian to be diagonally dominated. It is straightforward to verify that both conditions follows from the following set of inequalities, for all  $k = 1, \dots, d$ ,

$$e^{-|\mu_k|} \sum_{j=1}^d (|\mu_j| + e^{-|\mu_j|}) - (1 - e^{-|\mu_k|}) \sum_{j=1}^d (1 - e^{-|\mu_j|}) > 0$$

or equivalently,

$$\begin{aligned} & e^{-|\mu_k|} + e^{-|\mu_k|} \frac{1}{d} \sum_{j=1}^d |\mu_j| + \frac{1}{d} \sum_{j=1}^d e^{-|\mu_j|} - 1 > 0 \\ \Leftrightarrow & e^{-|\mu_k|} \left( \frac{d+1}{d} + \frac{1}{d} |\mu_k| \right) + e^{-|\mu_k|} \left( \frac{1}{d} \sum_{j=1, j \neq k}^d |\mu_j| \right) \\ & + \frac{1}{d} \sum_{j=1, j \neq k}^d e^{-|\mu_j|} - 1 > 0. \end{aligned} \quad (17)$$

Fixing  $\mu_k$  the left-hand-side is decomposed to a sum of one variable convex functions  $\mu_j$ . We minimize it for each  $\mu_j$  by taking the derivative and setting it to zero, yielding,

$$\frac{1}{d} \left( \text{sign}(\mu_j) \left[ e^{-|\mu_k|} - e^{-|\mu_j|} \right] \right) = 0 \Rightarrow \mu_j = \mu_k. \quad (18)$$

From here we conclude that (17) is satisfied if  $\|\boldsymbol{\mu}\|_\infty \leq a$  for a scalar  $a \geq 0$  that satisfy,

$$g(a) = 2e^{-a} + ae^{-a} - 1 > 0.$$

The function  $g(a)$  is monotonically decreasing and continuous, with  $g(1) = 3/e - 1 > 0$ , which completes the proof. In fact, one can compute numerically and find that  $a^* \approx 1.146$  satisfy  $g(a^*) \approx 0$ , which leads to a slightly better constant than stated in the theorem. ■

## G Proof of Lemma 7

**Proof:** We first need to compute  $\ell_{lin}$  directly, as  $\alpha_k(\mathbf{x})$  is not defined on the standard basis, which contains few elements of the same value,

$$\begin{aligned} \Pr[\mathbf{e}_k \cdot \boldsymbol{\omega} \leq 0] &= \Pr[\omega_k \leq 0] = \Pr[(\omega_k - \mu_k) < -\mu_k] \\ &= \int_{-\infty}^{-\mu_k} (2\sigma)^{-1} e^{-\frac{|\omega_k|}{\sigma}} d\omega_k. \end{aligned}$$

Thus, if  $\mu_k \geq 0$  we get (the convex part)  $\Pr[\mathbf{e}_k \cdot \boldsymbol{\omega} \leq 0] = \frac{1}{2} \exp(-|\mu_k|)$ . Otherwise, we bound  $\Pr[\mathbf{e}_k \cdot \boldsymbol{\omega} \leq 0]$  with the linear extension and get  $\frac{1}{2}(1 + |\mu_k|)$ . To conclude, for each element  $k$  we get that,  $\sum_{y=\pm 1} \ell_{lin}(y\mathbf{e}_k \cdot \boldsymbol{\mu}) = \frac{1}{2}(\exp\{-|\mu_k|\} + (1 + |\mu_k|))$ . Taking the sum over  $k$  and multiplying by 2 yields the above regularization term. ■

## H RobuCop Pseudo-code

**Input:** Training set  $S = \{(\mathbf{x}_i, y_i)\}_{i=1}^m$ ,  $c > 0$ , Artificial set  $\mathcal{A} = \{(\mathbf{e}_k, y) : k = 1 \dots d, y \in \mathcal{Y}\}$   
**Initialization:**  $\boldsymbol{\mu}^{(1)} = 0$   
**Loop** do until convergence criterion met:

- Set:  $\sigma^{(n+1)} = d \left( \sum_{k=1}^d |\mu_k| + \exp\{-|\mu_k|\} \right)^{-1}$
  - Solve  $\boldsymbol{\mu}^{(n+1)} = \arg \min_{\boldsymbol{\mu}} \{ \sum_{S \cup \mathcal{A}} \tilde{c}_i \cdot \ell_{lin}(y\mathbf{x}_i \cdot \boldsymbol{\mu}) \}$
- for:  $\tilde{c}_i = \begin{cases} c & (\mathbf{x}_i, y_i) \in S \\ 2\sigma^{(n+1)} & (\mathbf{x}_i, y_i) \in \mathcal{A} \end{cases}$

**Output:**  $\boldsymbol{\mu}, \sigma$

## I Proof of Lemma 8

**Proof:** Denote the change of the loss term of (12) by,

$$\begin{aligned} \Delta_t &= \sum_{i=1}^m \log \left( 1 + D_i e^{-y_i \mathbf{x}_i \cdot \boldsymbol{\mu}_Q^{(t)}} \right) \\ &\quad - \sum_{i=1}^m \log \left( 1 + D_i e^{-y_i \mathbf{x}_i \cdot [\boldsymbol{\mu}_Q^{(t)} + \boldsymbol{\delta}^{(t)}]} \right). \end{aligned}$$

We start by bounding  $\Delta_t$  from below, then add to it the difference of the regularization term, before and after the update. Bounding the improvement for a

single example, we get,

$$\begin{aligned}
 \frac{\Delta_{t,i}}{c} &= -\log\left(\frac{1 + D_i e^{-y_i \mathbf{x}_i \cdot \boldsymbol{\mu}_Q^{(t+1)}}}{1 + D_i e^{-y_i \mathbf{x}_i \cdot \boldsymbol{\mu}_Q^{(t)}}}\right) \\
 &= -\log\left(\frac{1}{1 + D_i e^{-y_i \mathbf{x}_i \cdot \boldsymbol{\mu}_Q^{(t)}}} + \frac{D_i e^{-y_i \mathbf{x}_i \cdot \boldsymbol{\mu}_Q^{(t+1)}}}{1 + D_i e^{-y_i \mathbf{x}_i \cdot \boldsymbol{\mu}_Q^{(t)}}}\right) \\
 &= -\log\left(1 - \frac{D_i}{D_i + e^{y_i \mathbf{x}_i \cdot \boldsymbol{\mu}_Q^{(t)}}} + \frac{D_i e^{-y_i \mathbf{x}_i \cdot [\boldsymbol{\mu}_Q^{(t+1)} - \boldsymbol{\mu}_Q^{(t)}]}}{D_i + e^{y_i \mathbf{x}_i \cdot \boldsymbol{\mu}_Q^{(t)}}}\right) \\
 &= -\log\left(1 - q_t(i) \left[1 - e^{-y_i \mathbf{x}_i \cdot \delta_k^{(t)}}\right]\right).
 \end{aligned}$$

By using  $-\log(1 - z) \geq z$  for  $z < 1$  we get,

$$\begin{aligned}
 &-\log\left(1 - q_t(i) \left[1 - e^{-y_i \mathbf{x}_i \cdot \delta_k^{(t)}}\right]\right) \\
 &\geq q_t(i) \left[1 - e^{-y_i \mathbf{x}_i \cdot \delta_k^{(t)}}\right].
 \end{aligned}$$

Convexity of the exponent, for every  $\sigma_{Q,k} \in (0, 1)$ , yields,

$$\begin{aligned}
 e^{-y_i \mathbf{x}_i \cdot \delta_k^{(t)}} &\leq \sigma_{Q,k} |x_{i,k}| e^{-\text{sign}(y_i \mathbf{x}_i \cdot \delta_k^{(t)}) \frac{\delta_k^{(t)}}{\sigma_{Q,k}}} \\
 &\quad + (1 - \sigma_{Q,k} |x_{i,k}|) e^0.
 \end{aligned}$$

Summing over the examples,

$$\begin{aligned}
 \Delta_t &\geq c \sum_{i=1}^m q_t(i) \sigma_{Q,k} |x_{i,k}| \left(1 - e^{-\text{sign}(y_i \mathbf{x}_i \cdot \delta_k^{(t)}) \frac{\delta_k^{(t)}}{\sigma_{Q,k}}}\right) \\
 &= c \sum_{i=1, y_i \mathbf{x}_i \cdot \delta_k^{(t)} \geq 0}^m q_t(i) \sigma_{Q,k} |x_{i,k}| \left(1 - e^{-\frac{\delta_k^{(t)}}{\sigma_{Q,k}}}\right) \\
 &\quad + c \sum_{i=1, y_i \mathbf{x}_i \cdot \delta_k^{(t)} < 0}^m q_t(i) \sigma_{Q,k} |x_{i,k}| \left(1 - e^{\frac{\delta_k^{(t)}}{\sigma_{Q,k}}}\right) \\
 &= c \sigma_{Q,k} \left(\gamma_k^+ \left[1 - e^{-\frac{\delta_k^{(t)}}{\sigma_{Q,k}}}\right] + \gamma_k^- \left[1 - e^{\frac{\delta_k^{(t)}}{\sigma_{Q,k}}}\right]\right),
 \end{aligned}$$

adding the regularization terms completes the proof.  $\blacksquare$

## J Proof of Lemma 9

**Proof:** Without loss of generality we assume that  $\gamma_k^+ e^{\frac{\mu_{Q,k}^{(t)}}{\sigma_{Q,k}}} - \gamma_k^- e^{-\frac{\mu_{Q,k}^{(t)}}{\sigma_{Q,k}}} > 0$ , and in addition we assume for the sake of contradiction that,  $\mu_{Q,k}^{(t)} + \delta_k^{(t)} < 0$ . Differentiating the objective with respect for  $\delta_k^{(t)}$  and

equating to zero yields:

$$\begin{aligned}
 &= \frac{\partial}{\partial \delta_k^{(t)}} \left\{ -\mu_{Q,k}^{(t)} - \delta_k^{(t)} + \sigma_{Q,k} e^{\frac{\mu_{Q,k}^{(t)} + \delta_k^{(t)}}{\sigma_{Q,k}}} \right. \\
 &\quad \left. + c \sigma_{Q,k} \left( \gamma_k^+ e^{-\frac{\delta_k^{(t)}}{\sigma_{Q,k}}} + \gamma_k^- e^{\frac{\delta_k^{(t)}}{\sigma_{Q,k}}} \right) \right\} \\
 &= -1 + e^{\frac{\mu_{Q,k}^{(t)} + \delta_k^{(t)}}{\sigma_{Q,k}}} - c \gamma_k^+ e^{-\frac{\delta_k^{(t)}}{\sigma_{Q,k}}} + c \gamma_k^- e^{\frac{\delta_k^{(t)}}{\sigma_{Q,k}}} = 0.
 \end{aligned}$$

Arranging the terms:

$$-c \gamma_k^+ e^{-\frac{\delta_k^{(t)}}{\sigma_{Q,k}}} + c \gamma_k^- e^{\frac{\delta_k^{(t)}}{\sigma_{Q,k}}} = 1 - e^{\frac{\mu_{Q,k}^{(t)} + \delta_k^{(t)}}{\sigma_{Q,k}}},$$

the right hand side is assumed to be strictly positive, and as for the left hand side:

$$\begin{aligned}
 &-\gamma_k^+ e^{-\frac{\delta_k^{(t)}}{\sigma_{Q,k}}} + \gamma_k^- e^{\frac{\delta_k^{(t)}}{\sigma_{Q,k}}} \\
 &< -\gamma_k^+ e^{-\frac{\delta_k^{(t)}}{\sigma_{Q,k}}} \cdot e^{\frac{\mu_{Q,k}^{(t)} + \delta_k^{(t)}}{\sigma_{Q,k}}} + \gamma_k^- e^{\frac{\delta_k^{(t)}}{\sigma_{Q,k}}} \cdot e^{-\frac{\mu_{Q,k}^{(t)} + \delta_k^{(t)}}{\sigma_{Q,k}}} \\
 &= -\left(\gamma_k^+ e^{\frac{\mu_{Q,k}^{(t)}}{\sigma_{Q,k}}} - \gamma_k^- e^{-\frac{\mu_{Q,k}^{(t)}}{\sigma_{Q,k}}}\right) < 0.
 \end{aligned}$$

This is a contradiction, so we must have that  $\delta_k^{(t)} + \mu_{Q,k}^{(t)} \geq 0$ . The proof for the symmetric case follows similarly.  $\blacksquare$

## K Experiments- Data Details:

**Synthetic data:** We generated 4,000 vectors  $\mathbf{x}_i \in \mathbb{R}^8$  sampled from a zero mean isotropic normal distribution  $\mathbf{x}_i \sim \mathcal{N}(\mathbf{0}, \mathbf{I})$ . Labels were assigned by generating once per run  $\boldsymbol{\omega} \in \mathbb{R}^8$  at random and using:  $y_i = \text{sign}(\boldsymbol{\omega} \cdot \mathbf{x}_i)$ . Each input  $\mathbf{x}_i$  training data was then corrupted with probability  $p$  by adding to it a random vector sampled from a zero mean isotropic Gaussian,  $\boldsymbol{\epsilon}_i \sim \mathcal{N}(\mathbf{0}, \sigma \mathbf{I})$ , with some positive standard-deviation  $\sigma$ . Each run was repeated 20 times, and results are average test-error over the 20 runs. All boosting algorithms were run for 1,000 iterations, except for the RobuCoP algorithm which was executed until a convergence criterion was met, which often was about 20 rounds.

**Vocal Joystick:** For each problem, we picked three sets of size 2,000 each, for training, parameter tuning and testing. Each example is a frame of spoken value described with 13 MFCC coefficients transformed into 27 features. In order to examine the robustness of different algorithms, we contaminate 10% of the data with an additive zero-mean i.i.d Gaussian noise, for different values of the standard-deviation  $\sigma$ .
